# Supplementary material
Source: publisher figshare collection journal article supplement (https://gsajournals.figshare.com/ndownloader/files/24370391)
Supplement: Supplementary file 1 [file 24370391]

**Table S2. Plasmids**

| **Plasmid #** | **Relevant Info** | **Reference** |
| --- | --- | --- |
| pNY51 | *hisG-URA3-hisG* cassette | Alani *et al.* 1987 |
| pRS303 | YIp vector containing *HIS3* | Sikorski and Hieter 1989 |
| pRS305 | YIp vector containing *LEU2* | Sikorski and Hieter 1989 |
| *ryB*-ZFN | ZFN construct | Beumer *et al*. 2006 |
| *ryA*-ZFN | ZFN construct | Beumer *et al*. 2006 |
| pSR1109 | *GAL1* regulated ZFN *ryA* fragment cloned into digested pRS303 |  |
| pSR1110 | *GAL1* regulated ZFN *ryB* fragment cloned into pRS305 |  |

Alani E., L. Cao, and N. Kleckner, 1987 A method for gene disruption that allows repeated use of *URA3* selection in the construction of multiply disrupted yeast strains. Genetics 116: 541–545.

Beumer K., G. Bhattacharyya, M. Bibikova, J. K. Trautman, and D. Carroll, 2006 Efficient gene targeting in Drosophila with zinc-finger nucleases. Genetics 172: 2391–2403.

Sikorski R. S., and P. Hieter, 1989 A system of Shuttle vectors and yeast host strains designed for efficient manipulation of DNA in *Saccharomyces cerevisia*. Genetics 122: 19–27.
